# Supplementary material for: Green Streets: Urban Green and Birth Outcomes
Source: MDPI journal article supplement (doi:10.3390/ijerph14070771), 2017-07-13
Supplement: s1 [file s1]

# Supplementary Materials: Green Streets: Urban Green and Birth Outcomes

Kathryn Abelt \* and Sara McLafferty

**Table S1.** Unadjusted mixed-effects logistic regression results for access to green spaces.

| Study Population                        |                 | Deprived Tracts |                  |
|-----------------------------------------|-----------------|-----------------|------------------|
| Term birthweight                        |                 |                 |                  |
| Coef.                                   | 95% CI          | Coef.           | 95% CI           |
| −11.5586 *                              | −21.9007−1.2166 | −26.9744 *      | −43.0978−10.8510 |
| Odds of term low birthweight            |                 |                 |                  |
| OR                                      | 95% CI          | OR              | 95% CI           |
| 1.0682                                  | 0.9506–1.2003   | 1.1942          | 0.9908–1.4394    |
| Odds of preterm birth                   |                 |                 |                  |
| OR                                      | 95% CI          | OR              | 95% CI           |
| 1.0987 *                                | 1.0242–1.1786   | 1.1503 *        | 1.0317–1.2825    |
| Odds of small for gestational age (SGA) |                 |                 |                  |
| OR                                      | 95% CI          | OR              | 95% CI           |
| 1.0538                                  | 0.9888–1.1230   | 1.1510 *        | 1.0438–1.2692    |

\* Denotes significance.

**Table S2.** Unadjusted mixed-effects logistic regression results for waterfront access.

| Study Population             |                 | Deprived Tracts |                 |
|------------------------------|-----------------|-----------------|-----------------|
| Term birthweight             |                 |                 |                 |
| Coef.                        | 95% CI          | Coef.           | 95% CI          |
| 5.7085                       | −2.9908–14.4079 | 9.0286          | −2.6690–20.7262 |
| Odds of term low birthweight |                 |                 |                 |
| OR                           | 95% CI          | OR              | 95% CI          |
| 0.9112                       | 0.8268–1.0042   | 0.9623          | 0.8461–1.0945   |
| Odds of preterm birth        |                 |                 |                 |
| OR                           | 95% CI          | OR              | 95% CI          |
| 1.009                        | 0.9522–1.0691   | 0.9717          | 0.8996–1.0495   |
| Odds of SGA                  |                 |                 |                 |
| OR                           | 95% CI          | OR              | 95% CI          |
| 0.9862                       | 0.9359–1.0392   | 1.011           | 0.9449–1.0817   |

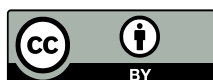

© 2017 by the authors; licensee MDPI, Basel, Switzerland. This article is an open access article distributed under the terms and conditions of the Creative Commons by Attribution (CC-BY) license (<http://creativecommons.org/licenses/by/4.0/>).
